# Supplementary material
Source: HighWire-hosted journal article supplement (http://www.ajnr.org/highwire/filestream/74336/field_highwire_adjunct_files/0/19-00775.pdf)
Supplement: 19-00775.pdf [file 19-00775.pdf]

**On-line Table: Number of metastases, most representative distributions,  $R^2$  values, likelihood ratios, and  $\alpha$  values for 68 patients**

| Patient No. | No. Metastases | Shapiro-Wilk P Value<br>(Normal Distribution Test) | Distribution | $R^2$ (P Value) | R (P Value)   | $\alpha$ Value |
|-------------|----------------|----------------------------------------------------|--------------|-----------------|---------------|----------------|
| 1           | 8              | .022                                               | Power        | 0.914 (<.001)   | 0.057 (.954)  | 0.601          |
| 2           | 16             | <.001                                              | Power        | 0.974 (<.001)   | 1.949 (.051)  | 0.680          |
| 3           | 6              | <.001                                              | Power        | 0.960 (<.001)   | 2.638 (.008)  | 1.330          |
| 4           | 6              | <.001                                              | Power        | 0.869 (<.001)   | 2.076 (.038)  | 1.419          |
| 5           | 12             | <.001                                              | Power        | 0.960 (<.001)   | 4.005 (<.001) | 1.166          |
| 6           | 17             | <.001                                              | Power        | 0.952 (<.001)   | 2.345 (.019)  | 0.587          |
| 7           | 6              | <.001                                              | Power        | 0.810 (.015)    | 2.750 (.005)  | 1.164          |
| 8           | 5              | .236                                               | Power        | 0.940 (.157)    | 0.317 (.751)  | 1.372          |
| 9           | 9              | .002                                               | Power        | 0.936 (<.001)   | 0.637 (.524)  | 0.7505         |
| 10          | 5              | <.001                                              | Power        | 0.958 (.004)    | 2.836 (.005)  | 1.833          |
| 11          | 6              | .047                                               | Power        | 0.869 (.007)    | 0.342 (.733)  | 0.872          |
| 12          | 7              | <.001                                              | Power        | 0.854 (.003)    | 1.633 (.102)  | 0.977          |
| 13          | 4              | .009                                               | Power        | 0.992 (.004)    | 1.017 (.309)  | 0.970          |
| 14          | 4              | .005                                               | Power        | 0.922 (.040)    | 0.713 (.476)  | 1.869          |
| 15          | 12             | <.001                                              | Power        | 0.962 (<.001)   | 3.997 (<.001) | 0.673          |
| 16          | 53             | <.001                                              | Power        | 0.911 (<.001)   | 3.233 (.001)  | 1.191          |
| 17          | 3              | .051                                               | Power        | 0.966 (.017)    | 0.775 (.438)  | 0.673          |
| 18          | 16             | <.001                                              | Power        | 0.894 (<.001)   | 2.149 (.032)  | 2.184          |
| 19          | 6              | <.001                                              | Power        | 0.973 (<.001)   | 1.576 (.115)  | 0.629          |
| 20          | 6              | .073                                               | Power        | 0.812 (.014)    | −0.272 (.786) | 1.711          |
| 21          | 4              | .076                                               | Power        | 0.851 (.077)    | 1.032 (.302)  | 0.692          |
| 22          | 13             | .039                                               | Cubic        | 0.983 (.001)    | 0.329 (.742)  | 2.212          |
| 23          | 3              | .045                                               | Exponential  | 0.998 (.028)    | 0.799 (.424)  | 0.740          |
| 24          | 5              | <.001                                              | Power        | 0.954 (.004)    | 2.497 (.013)  | 2.297          |
| 25          | 5              | .014                                               | Exponential  | 0.980 (.001)    | 0.502 (.615)  | 1.249          |
| 26          | 15             | <.001                                              | Exponential  | 0.963 (<.001)   | 0.763 (.446)  | 1.171          |
| 27          | 4              | .386                                               | Exponential  | 0.950 (.025)    | 0.059 (.952)  | 0.672          |
| 28          | 18             | <.001                                              | Power        | 0.938 (<.001)   | 3.511 (<.001) | 0.853          |
| 29          | 14             | <.001                                              | Exponential  | 0.973 (<.001)   | 1.484 (.138)  | 0.494          |
| 30          | 10             | <.001                                              | Power        | 0.976 (<.001)   | 2.478 (.013)  | 1.019          |
| 31          | 3              | .109                                               | Exponential  | 0.969 (.112)    | 0.585 (.559)  | 1.168          |
| 32          | 32             | <.001                                              | Power        | 0.968 (<.001)   | 2.145 (.031)  | 2.295          |
| 33          | 6              | .013                                               | Exponential  | 0.966 (.001)    | 1.066 (.286)  | 0.605          |
| 34          | 6              | .058                                               | Exponential  | 0.980 (.001)    | 0.118 (.906)  | 1.284          |
| 35          | 12             | <.001                                              | Power        | 0.923 (<.001)   | 2.251 (.024)  | 0.714          |
| 36          | 3              | .004                                               | Power        | 0.999 (.023)    | 1.278 (.201)  | 1.131          |
| 37          | 10             | <.001                                              | Power        | 0.974 (<.001)   | 1.104 (.270)  | 2.718          |
| 38          | 22             | <.001                                              | Exponential  | 0.978 (<.001)   | 0.479 (.632)  | 1.046          |
| 39          | 12             | <.001                                              | Power        | 0.968 (<.001)   | 2.517 (.012)  | 0.708          |
| 40          | 4              | .105                                               | Power        | 0.958 (.021)    | 0.306 (.759)  | 1.119          |
| 41          | 11             | <.001                                              | Power        | 0.927 (<.001)   | 4.713 (<.001) | 0.996          |
| 42          | 47             | <.001                                              | Exponential  | 0.971 (<.001)   | 1.875 (.061)  | 0.838          |
| 43          | 3              | .041                                               | Exponential  | 0.989 (.016)    | 0.383 (.701)  | 0.533          |
|             |                |                                                    |              |                 |               | 2.099          |

*Continued on next page*

On-line Table: Continued

| Patient No. | No. Metastases | Shapiro-Wilk P Value<br>(Normal Distribution Test) | Distribution | R <sup>2</sup> (P Value) | R (P Value)   | α Value |
|-------------|----------------|----------------------------------------------------|--------------|--------------------------|---------------|---------|
| 44          | 6              | .152                                               | Cubic        | 0.982 (.027)             | −0.244 (.807) | 0.687   |
| 45          | 3              | .091                                               | Exponential  | 0.999 (.017)             | 0.632 (.528)  | 1.786   |
| 46          | 5              | .006                                               | Cubic        | 0.996 (.053)             | 0.999 (.318)  | 1.188   |
| 47          | 3              | .204                                               | Power        | 0.993 (.054)             | 0.436 (.663)  | 0.656   |
| 48          | 3              | .089                                               | Inverse      | 0.962 (.125)             | 0.323 (.747)  | 2.719   |
| 49          | 3              | .019                                               | Power        | 0.999 (.021)             | 1.037 (.300)  | 2.217   |
| 50          | 12             | <.001                                              | Exponential  | 0.938 (<.001)            | 1.190 (.234)  | 0.814   |
| 51          | 7              | .587                                               | Log          | 0.972 (0.001)            | 0.280 (.779)  | 2.604   |
| 52          | 11             | <.001                                              | Cubic        | 0.984 (<.001)            | 2.830 (.005)  | 3.872   |
| 53          | 15             | <.001                                              | Exponential  | 0.938 (<.001)            | 1.841 (.065)  | 2.722   |
| 54          | 9              | <.001                                              | Power        | 0.978 (<.001)            | 3.648 (<.001) | 3.720   |
| 55          | 8              | <.001                                              | Exponential  | 0.938 (<.001)            | 1.473 (.141)  | 3.195   |
| 56          | 5              | <.001                                              | Cubic        | 0.982 (.169)             | 2.000 (.046)  | 3.850   |
| 57          | 3              | <.001                                              | S            | 0.972 (.108)             | 1.573 (.116)  | 9.290   |
| 58          | 45             | <.001                                              | Power        | 0.976 (<.001)            | 4.400 (<.001) | 2.523   |
| 59          | 14             | <.001                                              | Power        | .958 (<.001)             | 1.907 (.057)  | 1.878   |
| 60          | 11             | <.001                                              | Exponential  | 0.962 (<.001)            | 1.367 (.172)  | 3.850   |
| 61          | 4              | .651                                               | Exponential  | 0.762 (.127)             | 0.020 (.984)  | 1.842   |
| 62          | 84             | <.001                                              | Power        | 0.938 (<.001)            | 3.83 (<.001)  | 2.369   |
| 63          | 3              | .416                                               | Exponential  | 0.949 (.145)             | 0.168 (.866)  | 4.189   |
| 64          | 4              | .128                                               | Exponential  | 0.970 (.015)             | 0.540 (.589)  | 5.256   |
| 65          | 15             | <.001                                              | Exponential  | 0.965 (<.001)            | 1.906 (.057)  | 3.26    |
| 66          | 3              | .071                                               | S            | 0.998 (.026)             | 0.824 (.410)  | 2.961   |
| 67          | 8              | <.001                                              | Power        | 0.988 (<.001)            | 2.363 (.018)  | 3.587   |
| 68          | 11             | <.001                                              | Power        | 0.875 (<.001)            | 6.049 (<.001) | 3.21    |
